# Supplementary material
Source: HighWire-hosted journal article supplement (https://diabetes.diabetesjournals.org/content/suppl/2007/05/18/db07-0376)
Supplement: db070376OnlineAppendixTable8.pdf [file db070376OnlineAppendixTable8.pdf]

**Online-only Appendix Table 8.** Association of DCCT baseline variables with VEGF polymorphisms

| <b>Marker</b>                       |              |              |              | <b>P value</b> |
|-------------------------------------|--------------|--------------|--------------|----------------|
| <b>rs1547651</b>                    |              |              |              |                |
| Total cohort ( <i>n</i> = 1354)     |              |              |              |                |
| Genotype                            | <b>A/A</b>   | <b>A/T</b>   | <b>T/T</b>   |                |
| Counts                              | 941          | 382          | 31           |                |
| Sex                                 |              |              |              |                |
| Male ( <i>n</i> = 712)              | 487          | 205          | 20           |                |
| Female ( <i>n</i> = 642)            | 454          | 177          | 11           | 0.33           |
| DCCT treatment                      |              |              |              |                |
| Intensive ( <i>n</i> = 665)         | 456          | 193          | 16           |                |
| Conventional ( <i>n</i> = 689)      | 485          | 189          | 15           | 0.77           |
| Cohort                              |              |              |              |                |
| Primary ( <i>n</i> = 680)           | 479          | 182          | 19           |                |
| Secondary ( <i>n</i> = 674)         | 462          | 200          | 12           | 0.27           |
| Stimulated C-Peptide (pmol/ml)      | 0.12±0.12    | 0.10±0.11    | 0.10±0.11    | 0.073          |
| Age at diagnosis (years)            | 21.47±8.00   | 20.71±8.14   | 19.29±7.91   | 0.76           |
| Baseline age (years)                | 26.95±7.09   | 26.68±7.10   | 24.10±6.14   | 0.17           |
| Type 1 diabetes duration (years)    | 5.51±4.16    | 5.98±4.22    | 4.75±3.50    | 0.056          |
| HbA1c Eligibility %                 | 9.01±1.56    | 9.13±1.71    | 9.03±1.52    | 0.077          |
| BMI (kg/m <sup>2</sup> )            | 23.48±2.84   | 23.19±2.79   | 23.82±2.84   | 0.21           |
| Mean arterial blood pressure (mmHg) | 86.71±8.69   | 86.02±8.99   | 84.77±7.48   | 0.14           |
| Total cholesterol (mg/dl)           | 176.11±33.23 | 175.93±32.95 | 187.13±42.95 | 0.42           |
| HDL cholesterol (mg/dl)             | 50.34±12.07  | 50.29±12.40  | 52.42±14.12  | 0.73           |
| Triglyceride (mg/dl)                | 80.99±49.02  | 82.52±40.77  | 93.32±92.04  | 0.34           |
| Baseline smoking (pack/yr)          | 2.84±6.41    | 3.06±7.66    | 2.56±5.89    | 0.95           |
| AER (µg/min)                        | 15.98±19.39  | 15.48±15.67  | 14.73±26.46  | 0.11           |
| ETDRS scale                         | 2.15±1.55    | 2.28±1.61    | 1.84±1.29    | 0.15           |

| <b>rs699947</b>                     |              |              |              | <b>P value</b> |
|-------------------------------------|--------------|--------------|--------------|----------------|
| Total cohort ( <i>n</i> =1345)      |              |              |              |                |
| Genotype                            | <b>A/A</b>   | <b>A/C</b>   | <b>C/C</b>   |                |
| Counts                              | 340          | 651          | 354          |                |
| Sex                                 |              |              |              |                |
| Male ( <i>n</i> = 706)              | 186          | 346          | 174          |                |
| Female ( <i>n</i> = 639)            | 154          | 305          | 180          | 0.31           |
| DCCT treatment                      |              |              |              |                |
| Intensive ( <i>n</i> = 661)         | 168          | 318          | 175          |                |
| Conventional ( <i>n</i> = 684)      | 172          | 333          | 179          | 0.98           |
| Cohort                              |              |              |              |                |
| Primary ( <i>n</i> = 678)           | 171          | 333          | 174          |                |
| Secondary ( <i>n</i> = 667)         | 169          | 318          | 180          | 0.83           |
| Stimulated C-Peptide (pmol/ml)      | 0.11±0.12    | 0.11±0.12    | 0.12±0.12    | 0.50           |
| Age at diagnosis (years)            | 20.86±8.24   | 21.34±7.92   | 21.24±8.18   | 0.92           |
| Baseline age (years)                | 26.56±7.37   | 26.92±6.95   | 26.76±7.08   | 0.77           |
| Type 1 diabetes duration (years)    | 5.67±4.09    | 5.63±4.22    | 5.55±4.16    | 0.82           |
| HbA1c Eligibility %                 | 9.05±1.65    | 9.04±1.64    | 9.04±1.53    | 0.62           |
| BMI (kg/m <sup>2</sup> )            | 23.34±2.86   | 23.30±2.76   | 23.70±2.91   | 0.26           |
| Mean arterial blood pressure (mmHg) | 85.83±8.32   | 86.71±8.89   | 86.71±8.84   | 0.17           |
| Total cholesterol (mg/dl)           | 176.83±36.38 | 176.95±33.31 | 173.66±30.64 | 0.26           |
| HDL cholesterol (mg/dl)             | 51.42±12.54  | 50.02±12.15  | 50.04±12.16  | 0.21           |
| Triglyceride (mg/dl)                | 84.92±53.26  | 81.99±48.61  | 78.32±42.51  | 0.23           |
| Baseline smoking (pack/yr)          | 3.00±7.29    | 3.05±7.10    | 2.47±5.45    | 0.92           |
| AER (µg/min)                        | 17.27±25.73  | 15.35±15.11  | 15.04±14.53  | 0.42           |
| ETDRS scale                         | 2.15±1.58    | 2.17±1.53    | 2.23±1.61    | 0.84           |

| <b>rs2010963</b>                    |              |              |              | <b>P value</b> |
|-------------------------------------|--------------|--------------|--------------|----------------|
| Total cohort ( <i>n</i> = 1314)     |              |              |              |                |
| Genotype                            | <b>G/G</b>   | <b>C/G</b>   | <b>C/C</b>   |                |
| Counts                              | 136          | 564          | 614          |                |
| Sex                                 |              |              |              |                |
| Male ( <i>n</i> = 686)              | 69           | 292          | 325          |                |
| Female ( <i>n</i> = 628)            | 67           | 272          | 289          | 0.87           |
| DCCT treatment                      |              |              |              |                |
| Intensive ( <i>n</i> = 651)         | 70           | 284          | 297          |                |
| Conventional ( <i>n</i> = 663)      | 66           | 280          | 317          | 0.72           |
| Cohort                              |              |              |              |                |
| Primary ( <i>n</i> = 659)           | 71           | 277          | 311          |                |
| Secondary ( <i>n</i> = 655)         | 65           | 287          | 303          | 0.76           |
| Stimulated C-Peptide (pmol/ml)      | 0.12±0.13    | 0.12±0.12    | 0.11±0.12    | 0.073          |
| Age at diagnosis (years)            | 21.24±7.66   | 21.49±8.09   | 20.87±8.19   | 0.73           |
| Baseline age (years)                | 26.53±6.92   | 27.10±7.06   | 26.59±7.19   | 0.42           |
| Type 1 diabetes duration (years)    | 5.35±4.07    | 5.67±4.24    | 5.71±4.14    | 0.40           |
| HbA1c Eligibility %                 | 9.08±1.47    | 9.06±1.63    | 9.04±1.64    | 0.50           |
| BMI (kg/m <sup>2</sup> )            | 23.72±2.97   | 23.33±2.83   | 23.42±2.83   | 0.57           |
| Mean arterial blood pressure (mmHg) | 86.92±8.92   | 86.77±8.85   | 85.98±8.65   | 0.20           |
| Total cholesterol (mg/dl)           | 172.54±29.54 | 177.11±31.68 | 176.51±35.86 | 0.23           |
| HDL cholesterol (mg/dl)             | 49.61±11.40  | 50.37±12.38  | 50.64±12.43  | 0.66           |
| Triglyceride (mg/dl)                | 75.01±35.40  | 81.65±48.91  | 82.94±48.40  | 0.22           |
| Baseline smoking (pack/yr)          | 1.98±4.40    | 2.80±6.64    | 3.24±7.42    | 0.68           |
| AER (µg/min)                        | 15.16±15.68  | 15.31±15.33  | 16.49±21.93  | 0.54           |
| ETDRS scale                         | 2.30±1.80    | 2.18±1.51    | 2.17±1.57    | 0.85           |

| <b>rs3024987</b>                    |              |              |              | <b>P value</b> |
|-------------------------------------|--------------|--------------|--------------|----------------|
| Total cohort ( <i>n</i> = 1363)     |              |              |              |                |
| Genotype                            | <b>A/A</b>   | <b>A/G</b>   | <b>G/G</b>   |                |
| Counts                              | 30           | 284          | 1049         |                |
| Sex                                 |              |              |              |                |
| Male ( <i>n</i> = 719)              | 13           | 146          | 560          |                |
| Female ( <i>n</i> = 644)            | 17           | 138          | 489          | 0.48           |
| DCCT treatment                      |              |              |              |                |
| Intensive ( <i>n</i> = 671)         | 13           | 145          | 513          |                |
| Conventional ( <i>n</i> = 692)      | 17           | 139          | 536          | 0.66           |
| Cohort                              |              |              |              |                |
| Primary ( <i>n</i> = 684)           | 12           | 142          | 530          |                |
| Secondary ( <i>n</i> = 679)         | 18           | 142          | 519          | 0.53           |
| Stimulated C-Peptide (pmol/ml)      | 0.08±0.09    | 0.11±0.11    | 0.12±0.12    | 0.32           |
| Age at diagnosis (years)            | 18.93±7.89   | 21.33±8.07   | 21.23±8.09   | 0.69           |
| Baseline age (years)                | 25.10±7.25   | 26.89±6.95   | 26.86±7.14   | 0.28           |
| Type 1 diabetes duration (years)    | 6.11±4.12    | 5.59±4.09    | 5.65±4.21    | 0.47           |
| HbA1c Eligibility %                 | 9.20±1.55    | 9.01±1.66    | 9.04±1.59    | 0.77           |
| BMI (kg/m <sup>2</sup> )            | 23.99±2.75   | 23.48±2.92   | 23.37±2.81   | 0.49           |
| Mean arterial blood pressure (mmHg) | 87.99±9.96   | 86.33±8.73   | 86.51±8.69   | 0.39           |
| Total cholesterol (mg/dl)           | 182.70±37.01 | 176.21±33.18 | 176.13±33.36 | 0.72           |
| HDL cholesterol (mg/dl)             | 54.53±15.32  | 49.86±12.27  | 50.38±12.10  | 0.21           |
| Triglyceride (mg/dl)                | 82.47±30.17  | 80.85±44.05  | 82.13±49.78  | 0.47           |
| Baseline smoking (pack/yr)          | 2.52±5.17    | 3.35±7.21    | 2.80±6.70    | 0.75           |
| AER (µg/min)                        | 14.74±11.67  | 16.13±17.34  | 15.75±19.05  | 0.95           |
| ETDRS scale                         | 2.41±1.62    | 2.18±1.54    | 2.18±1.57    | 0.63           |

| <b>rs833068</b>                     |              |              |              | <b>P value</b> |
|-------------------------------------|--------------|--------------|--------------|----------------|
| Total cohort ( <i>n</i> = 1332)     |              |              |              |                |
| Genotype                            | <b>A/A</b>   | <b>A/G</b>   | <b>A/G</b>   |                |
| Counts                              | 143          | 576          | 613          |                |
| Sex                                 |              |              |              |                |
| Male ( <i>n</i> = 699)              | 70           | 304          | 325          |                |
| Female ( <i>n</i> = 633)            | 73           | 272          | 288          | 0.67           |
| DCCT treatment                      |              |              |              |                |
| Intensive ( <i>n</i> = 655)         | 73           | 286          | 296          |                |
| Conventional ( <i>n</i> = 677)      | 70           | 290          | 317          | 0.80           |
| Cohort                              |              |              |              |                |
| Primary ( <i>n</i> = 668)           | 77           | 287          | 304          |                |
| Secondary ( <i>n</i> = 664)         | 66           | 289          | 309          | 0.65           |
| Stimulated C-Peptide (pmol/ml)      | 0.12±0.13    | 0.12±0.12    | 0.11±0.12    | 0.048          |
| Age at diagnosis (years)            | 21.34±7.83   | 21.31±8.02   | 20.93±8.18   | 0.92           |
| Baseline age (years)                | 26.53±6.97   | 26.94±7.00   | 26.69±7.20   | 0.68           |
| Type 1 diabetes duration (years)    | 5.27±4.10    | 5.67±4.25    | 5.75±4.17    | 0.73           |
| HbA1c Eligibility %                 | 9.05±1.49    | 9.03±1.60    | 9.04±1.62    | 0.31           |
| BMI (kg/m <sup>2</sup> )            | 23.66±2.97   | 23.29±2.81   | 23.46±2.85   | 0.54           |
| Mean arterial blood pressure (mmHg) | 86.71±8.89   | 86.93±8.76   | 86.07±8.68   | 0.22           |
| Total cholesterol (mg/dl)           | 171.66±29.31 | 176.64±31.27 | 176.80±35.95 | 0.16           |
| HDL cholesterol (mg/dl)             | 49.50±11.30  | 50.23±12.17  | 50.57±12.36  | 0.60           |
| Triglyceride (mg/dl)                | 74.66±34.73  | 82.05±50.51  | 83.74±49.32  | 0.18           |
| Baseline smoking (pack/yr)          | 1.96±4.36    | 2.68±6.37    | 3.34±7.56    | 0.51           |
| AER (µg/min)                        | 14.87±15.41  | 15.36±15.16  | 16.45±21.99  | 0.44           |
| ETDRS scale                         | 2.25±1.78    | 2.17±1.50    | 2.20±1.59    | 0.92           |

| <b>rs833070</b>                     |              |              |              | <b>P value</b> |
|-------------------------------------|--------------|--------------|--------------|----------------|
| Total cohort ( <i>n</i> = 1330)     |              |              |              |                |
| Genotype                            | <b>T/T</b>   | <b>C/T</b>   | <b>C/C</b>   |                |
| Counts                              | 336          | 649          | 345          |                |
| Sex                                 |              |              |              |                |
| Male ( <i>n</i> = 696)              | 182          | 343          | 171          |                |
| Female ( <i>n</i> = 634)            | 154          | 306          | 174          | 0.45           |
| DCCT treatment                      |              |              |              |                |
| Intensive ( <i>n</i> = 655)         | 164          | 319          | 172          |                |
| Conventional ( <i>n</i> = 675)      | 172          | 330          | 173          | 0.96           |
| Cohort                              |              |              |              |                |
| Primary ( <i>n</i> = 664)           | 166          | 333          | 165          |                |
| Secondary ( <i>n</i> = 666)         | 170          | 316          | 180          | 0.56           |
| Stimulated C-Peptide (pmol/ml)      | 0.11±0.12    | 0.11±0.12    | 0.11±0.12    | 0.76           |
| Age at diagnosis (years)            | 20.85±8.16   | 21.37±8.01   | 21.11±8.14   | 0.41           |
| Baseline age (years)                | 26.65±7.34   | 26.92±7.00   | 26.72±7.02   | 0.70           |
| Type 1 diabetes duration (years)    | 5.77±4.15    | 5.60±4.21    | 5.64±4.18    | 0.86           |
| HbA1c Eligibility %                 | 9.04±1.65    | 9.01±1.61    | 9.12±1.56    | 0.56           |
| BMI (kg/m <sup>2</sup> )            | 23.42±2.82   | 23.29±2.80   | 23.61±2.90   | 0.55           |
| Mean arterial blood pressure (mmHg) | 85.86±8.36   | 86.62±8.92   | 86.57±8.89   | 0.28           |
| Total cholesterol (mg/dl)           | 177.59±36.51 | 176.89±33.03 | 172.99±30.29 | 0.12           |
| HDL cholesterol (mg/dl)             | 51.38±12.47  | 50.15±12.24  | 49.85±12.08  | 0.23           |
| Triglyceride (mg/dl)                | 85.52±53.45  | 81.61±48.56  | 77.58±39.13  | 0.20           |
| Baseline smoking (pack/yr)          | 3.16±7.59    | 2.99±7.01    | 2.39±5.32    | 0.92           |
| AER (µg/min)                        | 17.41±25.86  | 15.28±15.25  | 14.90±14.43  | 0.66           |
| ETDRS scale                         | 2.20±1.61    | 2.15±1.53    | 2.27±1.62    | 0.62           |

| <b>rs3024994</b>                    |              |              |              | <b>P value</b> |
|-------------------------------------|--------------|--------------|--------------|----------------|
| Total cohort ( <i>n</i> = 1363)     |              |              |              |                |
| Genotype                            | <b>A/A</b>   | <b>A/G</b>   | <b>G/G</b>   |                |
| Counts                              | 3            | 127          | 1233         |                |
| Sex                                 |              |              |              |                |
| Male ( <i>n</i> = 719)              | 1            | 67           | 651          |                |
| Female ( <i>n</i> = 644)            | 2            | 60           | 582          | 0.86           |
| DCCT treatment                      |              |              |              |                |
| Intensive ( <i>n</i> = 671)         | 0            | 58           | 613          |                |
| Conventional ( <i>n</i> = 692)      | 3            | 69           | 620          | 0.18           |
| Cohort                              |              |              |              |                |
| Primary ( <i>n</i> = 684)           | 2            | 62           | 620          |                |
| Secondary ( <i>n</i> = 679)         | 1            | 65           | 613          | 0.84           |
| Stimulated C-Peptide (pmol/ml)      | 0.16±0.20    | 0.11±0.11    | 0.11±0.12    | 0.88           |
| Age at diagnosis (years)            | 30.00±12.17  | 20.81±8.54   | 21.22±8.02   | 0.033          |
| Baseline age (years)                | 33.67±7.57   | 26.50±7.26   | 26.84±7.08   | 0.27           |
| Type 1 diabetes duration (years)    | 3.86±4.75    | 5.70±4.31    | 5.65±4.17    | 0.24           |
| HbA1c Eligibility %                 | 7.46±0.43    | 9.26±1.61    | 9.02±1.61    | 0.47           |
| BMI (kg/m <sup>2</sup> )            | 26.01±3.42   | 23.41±2.69   | 23.40±2.84   | 0.38           |
| Mean arterial blood pressure (mmHg) | 89.11±13.10  | 85.73±8.63   | 86.57±8.73   | 0.55           |
| Total cholesterol (mg/dl)           | 184.67±75.59 | 170.87±32.93 | 176.83±33.31 | 0.092          |
| HDL cholesterol (mg/dl)             | 60.67±5.86   | 47.76±11.55  | 50.60±12.26  | 0.015          |
| Triglyceride (mg/dl)                | 58.67±12.66  | 80.74±51.82  | 82.05±47.95  | 0.30           |
| Baseline smoking (pack/yr)          | 6.33±10.97   | 2.59±5.84    | 2.94±6.87    | 0.94           |
| AER (µg/min)                        | 10.56±3.00   | 13.38±11.23  | 16.07±19.17  | 0.33           |
| ETDRS scale                         | 2.00±1.73    | 2.15±1.51    | 2.19±1.57    | 0.96           |

| <b>rs2146323</b>                    |              |              |              | <b>P value</b> |
|-------------------------------------|--------------|--------------|--------------|----------------|
| Total cohort ( <i>n</i> = 1363)     |              |              |              |                |
| Genotype                            | <b>A/A</b>   | <b>A/C</b>   | <b>C/C</b>   |                |
| Counts                              | 173          | 628          | 562          |                |
| Sex                                 |              |              |              |                |
| Male ( <i>n</i> = 719)              | 97           | 336          | 286          |                |
| Female ( <i>n</i> = 644)            | 76           | 292          | 276          | 0.43           |
| DCCT treatment                      |              |              |              |                |
| Intensive ( <i>n</i> = 671)         | 79           | 319          | 273          |                |
| Conventional ( <i>n</i> = 692)      | 94           | 309          | 289          | 0.45           |
| Cohort                              |              |              |              |                |
| Primary ( <i>n</i> = 684)           | 88           | 323          | 273          |                |
| Secondary ( <i>n</i> = 679)         | 85           | 305          | 289          | 0.61           |
| Stimulated C-Peptide (pmol/ml)      | 0.11±0.12    | 0.11±0.12    | 0.12±0.12    | 0.76           |
| Age at diagnosis (years)            | 20.99±8.12   | 21.43±8.07   | 21.02±8.09   | 0.77           |
| Baseline age (years)                | 26.77±7.02   | 27.03±7.14   | 26.62±7.09   | 0.70           |
| Type 1 diabetes duration (years)    | 5.75±4.02    | 5.64±4.21    | 5.62±4.20    | 0.59           |
| HbA1c Eligibility %                 | 9.13±1.66    | 9.03±1.64    | 9.02±1.55    | 0.55           |
| BMI (kg/m <sup>2</sup> )            | 23.49±2.76   | 23.26±2.80   | 23.55±2.88   | 0.32           |
| Mean arterial blood pressure (mmHg) | 85.71±8.13   | 86.37±8.77   | 86.89±8.85   | 0.13           |
| Total cholesterol (mg/dl)           | 181.05±36.12 | 176.28±33.82 | 174.84±31.94 | 0.15           |
| HDL cholesterol (mg/dl)             | 50.91±12.68  | 50.31±12.26  | 50.24±12.05  | 0.89           |
| Triglyceride (mg/dl)                | 92.38±59.93  | 80.75±49.07  | 79.90±42.72  | 0.010          |
| Baseline smoking (pack/yr)          | 3.08±7.50    | 2.97±7.28    | 2.79±5.93    | 0.62           |
| AER (μg/min)                        | 16.44±28.90  | 15.13±14.39  | 16.38±18.67  | 0.022          |
| ETDRS scale                         | 2.24±1.75    | 2.14±1.51    | 2.22±1.58    | 0.69           |

| <b>rs3025007</b>                    |              |              |              | <b>P value</b> |
|-------------------------------------|--------------|--------------|--------------|----------------|
| Total cohort ( <i>n</i> = 1359)     |              |              |              |                |
| Genotype                            | <b>A/A</b>   | <b>A/G</b>   | <b>G/G</b>   |                |
| Counts                              | 275          | 646          | 438          |                |
| Sex                                 |              |              |              |                |
| Male ( <i>n</i> = 717)              | 138          | 353          | 226          |                |
| Female ( <i>n</i> = 642)            | 137          | 293          | 212          | 0.39           |
| DCCT treatment                      |              |              |              |                |
| Intensive ( <i>n</i> = 669)         | 123          | 339          | 207          |                |
| Conventional ( <i>n</i> = 690)      | 152          | 307          | 231          | 0.061          |
| Cohort                              |              |              |              |                |
| Primary ( <i>n</i> = 681)           | 144          | 320          | 217          |                |
| Secondary ( <i>n</i> = 678)         | 131          | 326          | 221          | 0.71           |
| Stimulated C-Peptide (pmol/ml)      | 0.11±0.12    | 0.11±0.12    | 0.11±0.12    | 0.87           |
| Age at diagnosis (years)            | 21.58±7.92   | 21.07±7.95   | 21.12±8.37   | 0.47           |
| Baseline age (years)                | 27.07±7.08   | 26.76±7.12   | 26.75±7.09   | 0.79           |
| Type 1 diabetes duration (years)    | 5.46±4.11    | 5.74±4.17    | 5.65±4.25    | 0.83           |
| HbA1c Eligibility %                 | 8.97±1.65    | 9.02±1.56    | 9.11±1.65    | 0.58           |
| BMI (kg/m <sup>2</sup> )            | 23.65±2.82   | 23.30±2.85   | 23.40±2.80   | 0.21           |
| Mean arterial blood pressure (mmHg) | 87.11±8.32   | 86.29±8.89   | 86.47±8.71   | 0.42           |
| Total cholesterol (mg/dl)           | 177.57±37.11 | 176.55±32.82 | 175.06±31.92 | 0.70           |
| HDL cholesterol (mg/dl)             | 51.53±12.37  | 49.94±12.03  | 50.33±12.39  | 0.19           |
| Triglyceride (mg/dl)                | 82.09±43.20  | 83.83±53.66  | 78.79±42.72  | 0.51           |
| Baseline smoking (pack/yr)          | 3.50±7.49    | 2.91±6.79    | 2.51±6.28    | 0.46           |
| AER (µg/min)                        | 17.58±26.00  | 15.78±17.41  | 14.84±14.10  | 0.93           |
| ETDRS scale                         | 2.11±1.55    | 2.19±1.54    | 2.25±1.62    | 0.54           |

| <b>rs3025010</b>                    |              |              |              | <b>P value</b> |
|-------------------------------------|--------------|--------------|--------------|----------------|
| Total cohort ( <i>n</i> = 1341)     |              |              |              |                |
| Genotype                            | <b>C/C</b>   | <b>C/T</b>   | <b>T/T</b>   |                |
| Counts                              | 186          | 643          | 512          |                |
| Sex                                 |              |              |              |                |
| Male ( <i>n</i> = 705)              | 102          | 344          | 259          |                |
| Female ( <i>n</i> = 636)            | 84           | 299          | 253          | 0.49           |
| DCCT treatment                      |              |              |              |                |
| Intensive ( <i>n</i> = 662)         | 91           | 318          | 253          |                |
| Conventional ( <i>n</i> = 679)      | 95           | 325          | 259          | 0.99           |
| Cohort                              |              |              |              |                |
| Primary ( <i>n</i> = 673)           | 92           | 332          | 249          |                |
| Secondary ( <i>n</i> = 668)         | 94           | 311          | 263          | 0.59           |
| Stimulated C-Peptide (pmol/ml)      | 0.11±0.12    | 0.11±0.12    | 0.12±0.12    | 0.50           |
| Age at diagnosis (years)            | 20.62±8.30   | 21.41±8.09   | 21.10±8.02   | 0.73           |
| Baseline age (years)                | 26.52±7.27   | 26.96±7.09   | 26.72±7.09   | 0.61           |
| Type 1 diabetes duration (years)    | 5.85±4.02    | 5.59±4.19    | 5.64±4.22    | 0.72           |
| HbA1c Eligibility %                 | 9.13±1.66    | 9.04±1.66    | 9.02±1.54    | 0.35           |
| BMI (kg/m <sup>2</sup> )            | 23.62±2.77   | 23.24±2.79   | 23.52±2.90   | 0.29           |
| Mean arterial blood pressure (mmHg) | 85.87±7.99   | 86.48±8.72   | 86.69±8.98   | 0.37           |
| Total cholesterol (mg/dl)           | 180.52±35.97 | 175.75±33.54 | 175.45±32.00 | 0.29           |
| HDL cholesterol (mg/dl)             | 50.80±12.61  | 50.38±12.21  | 50.05±11.98  | 0.88           |
| Triglyceride (mg/dl)                | 93.62±61.58  | 79.52±47.22  | 80.50±43.38  | 0.0035         |
| Baseline smoking (pack/yr)          | 3.09±7.49    | 2.86±7.17    | 2.87±5.93    | 0.21           |
| AER (µg/min)                        | 17.25±30.75  | 14.80±12.78  | 16.43±18.14  | 0.022          |
| ETDRS scale                         | 2.25±1.73    | 2.11±1.47    | 2.24±1.60    | 0.52           |

**rs3025020**

| Total cohort ( <i>n</i> = 1362)     |              |              |              | <b>P value</b> |
|-------------------------------------|--------------|--------------|--------------|----------------|
| Genotype                            | <b>A/A</b>   | <b>A/G</b>   | <b>G/G</b>   |                |
| Counts                              | 145          | 583          | 634          |                |
| Sex                                 |              |              |              |                |
| Male ( <i>n</i> = 718)              | 83           | 314          | 321          |                |
| Female ( <i>n</i> = 644)            | 62           | 269          | 313          | 0.27           |
| DCCT treatment                      |              |              |              |                |
| Intensive ( <i>n</i> = 671)         | 72           | 283          | 316          |                |
| Conventional ( <i>n</i> = 691)      | 73           | 300          | 318          | 0.90           |
| Cohort                              |              |              |              |                |
| Primary ( <i>n</i> = 684)           | 65           | 302          | 317          |                |
| Secondary ( <i>n</i> = 678)         | 80           | 281          | 317          | 0.32           |
| Stimulated C-Peptide (pmol/ml)      | 0.10±0.11    | 0.12±0.12    | 0.11±0.11    | 0.79           |
| Age at diagnosis (years)            | 21.64±7.88   | 21.74±8.05   | 20.60±8.13   | 0.69           |
| Baseline age (years)                | 27.48±7.20   | 27.20±7.10   | 26.33±7.05   | 0.032          |
| Type 1 diabetes duration (years)    | 5.83±4.00    | 5.50±4.14    | 5.74±4.26    | 0.041          |
| HbA1c Eligibility %                 | 9.00±1.58    | 9.12±1.73    | 8.98±1.49    | 0.56           |
| BMI (kg/m <sup>2</sup> )            | 23.36±2.86   | 23.41±2.86   | 23.41±2.80   | 1.00           |
| Mean arterial blood pressure (mmHg) | 88.16±7.67   | 86.41±8.96   | 86.21±8.72   | 0.033          |
| Total cholesterol (mg/dl)           | 180.99±31.08 | 177.25±34.19 | 174.34±33.10 | 0.087          |
| HDL cholesterol (mg/dl)             | 49.88±11.43  | 50.85±12.42  | 50.05±12.20  | 0.55           |
| Triglyceride (mg/dl)                | 87.74±47.92  | 81.74±49.89  | 80.62±46.82  | 0.10           |
| Baseline smoking (pack/yr)          | 2.81±6.00    | 3.23±7.43    | 2.64±6.31    | 0.35           |
| AER (µg/min)                        | 17.03±18.64  | 15.59±17.32  | 15.76±19.65  | 0.43           |
| ETDRS scale                         | 2.24±1.41    | 2.15±1.56    | 2.21±1.61    | 0.41           |

**rs3025021**

| Total cohort ( <i>n</i> = 1342)     |              |              |              | <b>P value</b> |
|-------------------------------------|--------------|--------------|--------------|----------------|
| Genotype                            | <b>C/C</b>   | <b>C/T</b>   | <b>T/T</b>   |                |
| Counts                              | 616          | 586          | 140          |                |
| Sex                                 |              |              |              |                |
| Male ( <i>n</i> = 705)              | 335          | 296          | 74           |                |
| Female ( <i>n</i> = 637)            | 281          | 290          | 66           | 0.41           |
| DCCT treatment                      |              |              |              |                |
| Intensive ( <i>n</i> = 661)         | 293          | 291          | 77           |                |
| Conventional ( <i>n</i> = 681)      | 323          | 295          | 63           | 0.28           |
| Cohort                              |              |              |              |                |
| Primary ( <i>n</i> = 671)           | 314          | 291          | 66           |                |
| Secondary ( <i>n</i> = 671)         | 302          | 295          | 74           | 0.70           |
| Stimulated C-Peptide (pmol/ml)      | 0.11±0.12    | 0.12±0.12    | 0.10±0.11    | 0.72           |
| Age at diagnosis (years)            | 21.27±7.89   | 21.28±8.23   | 20.55±8.26   | 0.68           |
| Baseline age (years)                | 26.84±7.12   | 26.94±7.00   | 26.41±7.37   | 0.58           |
| Type 1 diabetes duration (years)    | 5.60±4.13    | 5.69±4.29    | 5.86±4.08    | 0.76           |
| HbA1c Eligibility %                 | 9.07±1.64    | 9.01±1.60    | 9.08±1.50    | 0.70           |
| BMI (kg/m <sup>2</sup> )            | 23.40±2.85   | 23.30±2.85   | 23.80±2.67   | 0.15           |
| Mean arterial blood pressure (mmHg) | 86.79±8.44   | 85.96±9.09   | 87.37±8.21   | 0.084          |
| Total cholesterol (mg/dl)           | 176.30±33.15 | 176.94±34.09 | 171.54±29.26 | 0.32           |
| HDL cholesterol (mg/dl)             | 50.13±12.06  | 50.58±12.55  | 49.88±11.34  | 0.90           |
| Triglyceride (mg/dl)                | 80.79±45.81  | 83.22±51.96  | 80.60±44.09  | 0.74           |
| Baseline smoking (pack/yr)          | 3.13±6.99    | 3.02±7.07    | 2.02±4.96    | 0.077          |
| AER (μg/min)                        | 15.26±15.06  | 16.73±22.89  | 14.19±10.72  | 0.85           |
| ETDRS scale                         | 2.13±1.51    | 2.24±1.64    | 2.22±1.49    | 0.58           |

**rs3025028**

| Total cohort ( <i>n</i> = 1367)     |              |              |              | <b>P value</b> |
|-------------------------------------|--------------|--------------|--------------|----------------|
| Genotype                            | <b>C/C</b>   | <b>C/G</b>   | <b>G/G</b>   |                |
| Counts                              | 426          | 695          | 246          |                |
| Sex                                 |              |              |              |                |
| Male ( <i>n</i> = 720)              | 226          | 367          | 127          |                |
| Female ( <i>n</i> = 647)            | 200          | 328          | 119          | 0.93           |
| DCCT treatment                      |              |              |              |                |
| Intensive ( <i>n</i> = 672)         | 203          | 337          | 132          |                |
| Conventional ( <i>n</i> = 695)      | 223          | 358          | 114          | 0.29           |
| Cohort                              |              |              |              |                |
| Primary ( <i>n</i> = 686)           | 220          | 345          | 121          |                |
| Secondary ( <i>n</i> = 681)         | 206          | 350          | 125          | 0.77           |
| Stimulated C-Peptide (pmol/ml)      | 0.12±0.12    | 0.11±0.12    | 0.11±0.12    | 0.56           |
| Age at diagnosis (years)            | 20.89±7.92   | 21.54±8.03   | 20.85±8.47   | 0.49           |
| Baseline age (years)                | 26.39±7.03   | 27.23±7.03   | 26.47±7.38   | 0.37           |
| Type 1 diabetes duration (years)    | 5.54±4.17    | 5.71±4.18    | 5.62±4.20    | 0.11           |
| HbA1c Eligibility %                 | 9.08±1.65    | 9.00±1.61    | 9.09±1.51    | 0.73           |
| BMI (kg/m <sup>2</sup> )            | 23.46±2.86   | 23.29±2.85   | 23.61±2.70   | 0.19           |
| Mean arterial blood pressure (mmHg) | 86.59±8.40   | 86.34±9.02   | 86.67±8.55   | 0.85           |
| Total cholesterol (mg/dl)           | 177.18±33.02 | 177.40±34.02 | 171.38±31.76 | 0.041          |
| HDL cholesterol (mg/dl)             | 50.19±12.15  | 50.40±12.24  | 50.67±12.29  | 0.92           |
| Triglyceride (mg/dl)                | 80.79±45.71  | 83.72±51.91  | 78.12±41.15  | 0.54           |
| Baseline smoking (pack/yr)          | 2.69±6.30    | 3.27±7.54    | 2.32±5.16    | 0.24           |
| AER (μg/min)                        | 16.08±16.77  | 15.59±19.55  | 15.95±18.59  | 0.18           |
| ETDRS scale                         | 2.16±1.55    | 2.23±1.62    | 2.13±1.43    | 0.82           |

**rs3025030**

| Total cohort ( <i>n</i> = 1308)     |                |                |               | <b>P value</b> |
|-------------------------------------|----------------|----------------|---------------|----------------|
| Genotype                            | <b>G/G</b>     | <b>C/G</b>     | <b>C/C</b>    |                |
| Counts                              | 31             | 285            | 992           |                |
| Sex                                 |                |                |               |                |
| Male ( <i>n</i> = 687)              | 19             | 142            | 526           |                |
| Female ( <i>n</i> = 621)            | 12             | 143            | 466           | 0.39           |
| DCCT treatment                      |                |                |               |                |
| Intensive ( <i>n</i> = 642)         | 12             | 141            | 489           |                |
| Conventional ( <i>n</i> = 666)      | 19             | 144            | 503           | 0.52           |
| Cohort                              |                |                |               |                |
| Primary ( <i>n</i> = 659)           | 22             | 154            | 483           |                |
| Secondary ( <i>n</i> = 649)         | 9              | 131            | 509           | 0.019          |
| Stimulated C-Peptide (pmol/ml)      | 0.14 ± 0.11    | 0.11 ± 0.12    | 0.11 ± 0.12   | 0.15           |
| Age at diagnosis (years)            | 21.68 ± 8.29   | 20.68 ± 7.91   | 21.28 ± 8.16  | 0.37           |
| Baseline age (years)                | 25.68 ± 8.17   | 26.19 ± 6.82   | 27.01 ± 7.18  | 0.54           |
| Type 1 diabetes duration (years)    | 3.98 ± 2.64    | 5.53 ± 4.28    | 5.75 ± 4.19   | 0.11           |
| HbA1c Eligibility %                 | 9.16 ± 1.48    | 8.91 ± 1.55    | 9.06 ± 1.63   | 0.12           |
| BMI (kg/m <sup>2</sup> )            | 23.35 ± 3.05   | 23.42 ± 2.89   | 23.38 ± 2.8   | 0.83           |
| Mean arterial blood pressure (mmHg) | 84.9 ± 8.48    | 85.74 ± 8.57   | 86.69 ± 8.83  | 0.10           |
| Total cholesterol (mg/dl)           | 171.74 ± 43.46 | 177.83 ± 32.26 | 175.8 ± 33.21 | 0.28           |
| HDL cholesterol (mg/dl)             | 49.84 ± 13.17  | 50.72 ± 11.88  | 50.35 ± 12.31 | 0.73           |
| Triglyceride (mg/dl)                | 96.87 ± 102.7  | 79.91 ± 40.49  | 81.7 ± 47.29  | 0.86           |
| Baseline smoking (pack/yr)          | 3.12 ± 6.64    | 2.86 ± 7.29    | 2.88 ± 6.69   | 0.90           |
| AER (μg/min)                        | 12.91 ± 8.28   | 15.62 ± 22.25  | 15.98 ± 17.85 | 0.45           |
| ETDRS scale                         | 1.58 ± 1.15    | 2.24 ± 1.77    | 2.20 ± 1.53   | 0.037          |

**rs3025035**

| Total cohort ( <i>n</i> = 1363)     |              |              |              | <b>P value</b> |
|-------------------------------------|--------------|--------------|--------------|----------------|
| Genotype                            | <b>A/A</b>   | <b>A/G</b>   | <b>G/G</b>   |                |
| Counts                              | 6            | 185          | 1172         |                |
| Sex                                 |              |              |              |                |
| Male ( <i>n</i> = 719)              | 1            | 106          | 612          |                |
| Female ( <i>n</i> = 644)            | 5            | 79           | 560          | 0.093          |
| DCCT treatment                      |              |              |              |                |
| Intensive ( <i>n</i> = 671)         | 3            | 96           | 572          |                |
| Conventional ( <i>n</i> = 692)      | 3            | 89           | 600          | 0.78           |
| Cohort                              |              |              |              |                |
| Primary ( <i>n</i> = 684)           | 1            | 89           | 594          |                |
| Secondary ( <i>n</i> = 679)         | 5            | 96           | 578          | 0.22           |
| Stimulated C-Peptide (pmol/ml)      | 0.05±0.06    | 0.11±0.12    | 0.11±0.12    | 0.31           |
| Age at diagnosis (years)            | 20.00±9.47   | 20.30±8.25   | 21.35±8.04   | 0.83           |
| Baseline age (years)                | 28.83±8.21   | 26.23±7.27   | 26.91±7.07   | 0.30           |
| Type 1 diabetes duration (years)    | 8.99±5.07    | 5.89±4.32    | 5.59±4.15    | 0.41           |
| HbA1c Eligibility %                 | 9.17±1.05    | 9.08±1.64    | 9.03±1.61    | 0.18           |
| BMI (kg/m <sup>2</sup> )            | 23.34±3.55   | 23.43±2.91   | 23.40±2.81   | 0.94           |
| Mean arterial blood pressure (mmHg) | 81.72±10.05  | 87.26±8.63   | 86.41±8.73   | 0.25           |
| Total cholesterol (mg/dl)           | 167.50±19.25 | 174.83±33.79 | 176.57±33.40 | 0.66           |
| HDL cholesterol (mg/dl)             | 38.50±9.22   | 48.30±12.11  | 50.75±12.20  | 0.0015         |
| Triglyceride (mg/dl)                | 122.33±65.11 | 85.49±48.21  | 81.10±48.12  | 0.038          |
| Baseline smoking (pack/yr)          | 5.70±13.86   | 2.46±6.35    | 2.97±6.80    | 0.46           |
| AER (μg/min)                        | 29.28±34.17  | 15.87±15.02  | 15.73±18.96  | 0.41           |
| ETDRS scale                         | 4.33±1.86    | 2.25±1.65    | 2.17±1.55    | 0.017          |

**rs3025053**

| Total cohort ( <i>n</i> = 1363)     |              |              |              | <b>P value</b> |
|-------------------------------------|--------------|--------------|--------------|----------------|
| Genotype                            | <b>A/A</b>   | <b>A/G</b>   | <b>G/G</b>   |                |
| Counts                              | 23           | 253          | 1087         |                |
| Sex                                 |              |              |              |                |
| Male ( <i>n</i> = 719)              | 9            | 150          | 560          |                |
| Female ( <i>n</i> = 644)            | 14           | 103          | 527          | 0.035          |
| DCCT treatment                      |              |              |              |                |
| Intensive ( <i>n</i> = 671)         | 10           | 122          | 539          |                |
| Conventional ( <i>n</i> = 692)      | 13           | 131          | 548          | 0.81           |
| Cohort                              |              |              |              |                |
| Primary ( <i>n</i> = 684)           | 12           | 133          | 539          |                |
| Secondary ( <i>n</i> = 679)         | 11           | 120          | 548          | 0.68           |
| Stimulated C-Peptide (pmol/ml)      | 0.09±0.11    | 0.12±0.12    | 0.11±0.12    | 0.67           |
| Age at diagnosis (years)            | 21.65±7.64   | 22.00±8.28   | 21.01±8.04   | 0.86           |
| Baseline age (years)                | 27.83±6.36   | 27.43±7.32   | 26.67±7.06   | 0.22           |
| Type 1 diabetes duration (years)    | 6.34±4.67    | 5.39±4.26    | 5.69±4.15    | 0.17           |
| HbA1c Eligibility %                 | 9.01±1.33    | 9.09±1.62    | 9.03±1.61    | 0.48           |
| BMI (kg/m <sup>2</sup> )            | 23.20±2.54   | 23.30±2.82   | 23.43±2.84   | 0.81           |
| Mean arterial blood pressure (mmHg) | 85.16±9.82   | 87.15±8.38   | 86.38±8.78   | 0.34           |
| Total cholesterol (mg/dl)           | 167.57±25.95 | 173.66±35.61 | 177.09±32.97 | 0.17           |
| HDL cholesterol (mg/dl)             | 49.13±14.25  | 50.74±12.50  | 50.30±12.12  | 0.81           |
| Triglyceride (mg/dl)                | 84.78±56.88  | 81.11±57.36  | 81.99±45.74  | 0.35           |
| Baseline smoking (pack/yr)          | 3.06±5.31    | 3.96±7.75    | 2.66±6.55    | 0.022          |
| AER (µg/min)                        | 18.22±18.95  | 14.00±11.93  | 16.18±19.77  | 0.67           |
| ETDRS scale                         | 2.13±1.66    | 2.08±1.46    | 2.21±1.59    | 0.56           |

Data were measured at time of recruitment to DCCT (except HbA1C which was measured at eligibility) and are represented as means ± SD. Fisher's exact test P values are reported for categorical traits; Kruskal-Wallis non-parametric P values are used for continuous traits.

The following variables were Ln transformed to normalize the data for statistical analysis: eligibility F total cholesterol, HDL cholesterol, triglycerides, and AER. ETDRS scale is obtained by scoring the patients according to ETDRS scoring system.
